# Supplementary material for: Complete genome reveals genetic repertoire and potential metabolic strategies involved in lignin degradation by environmental ligninolytic Klebsiella variicola P1CD1
Source: PubMed Central journal article supplement (PMC7755216; doi:10.1371/journal.pone.0243739), 2020-12-22

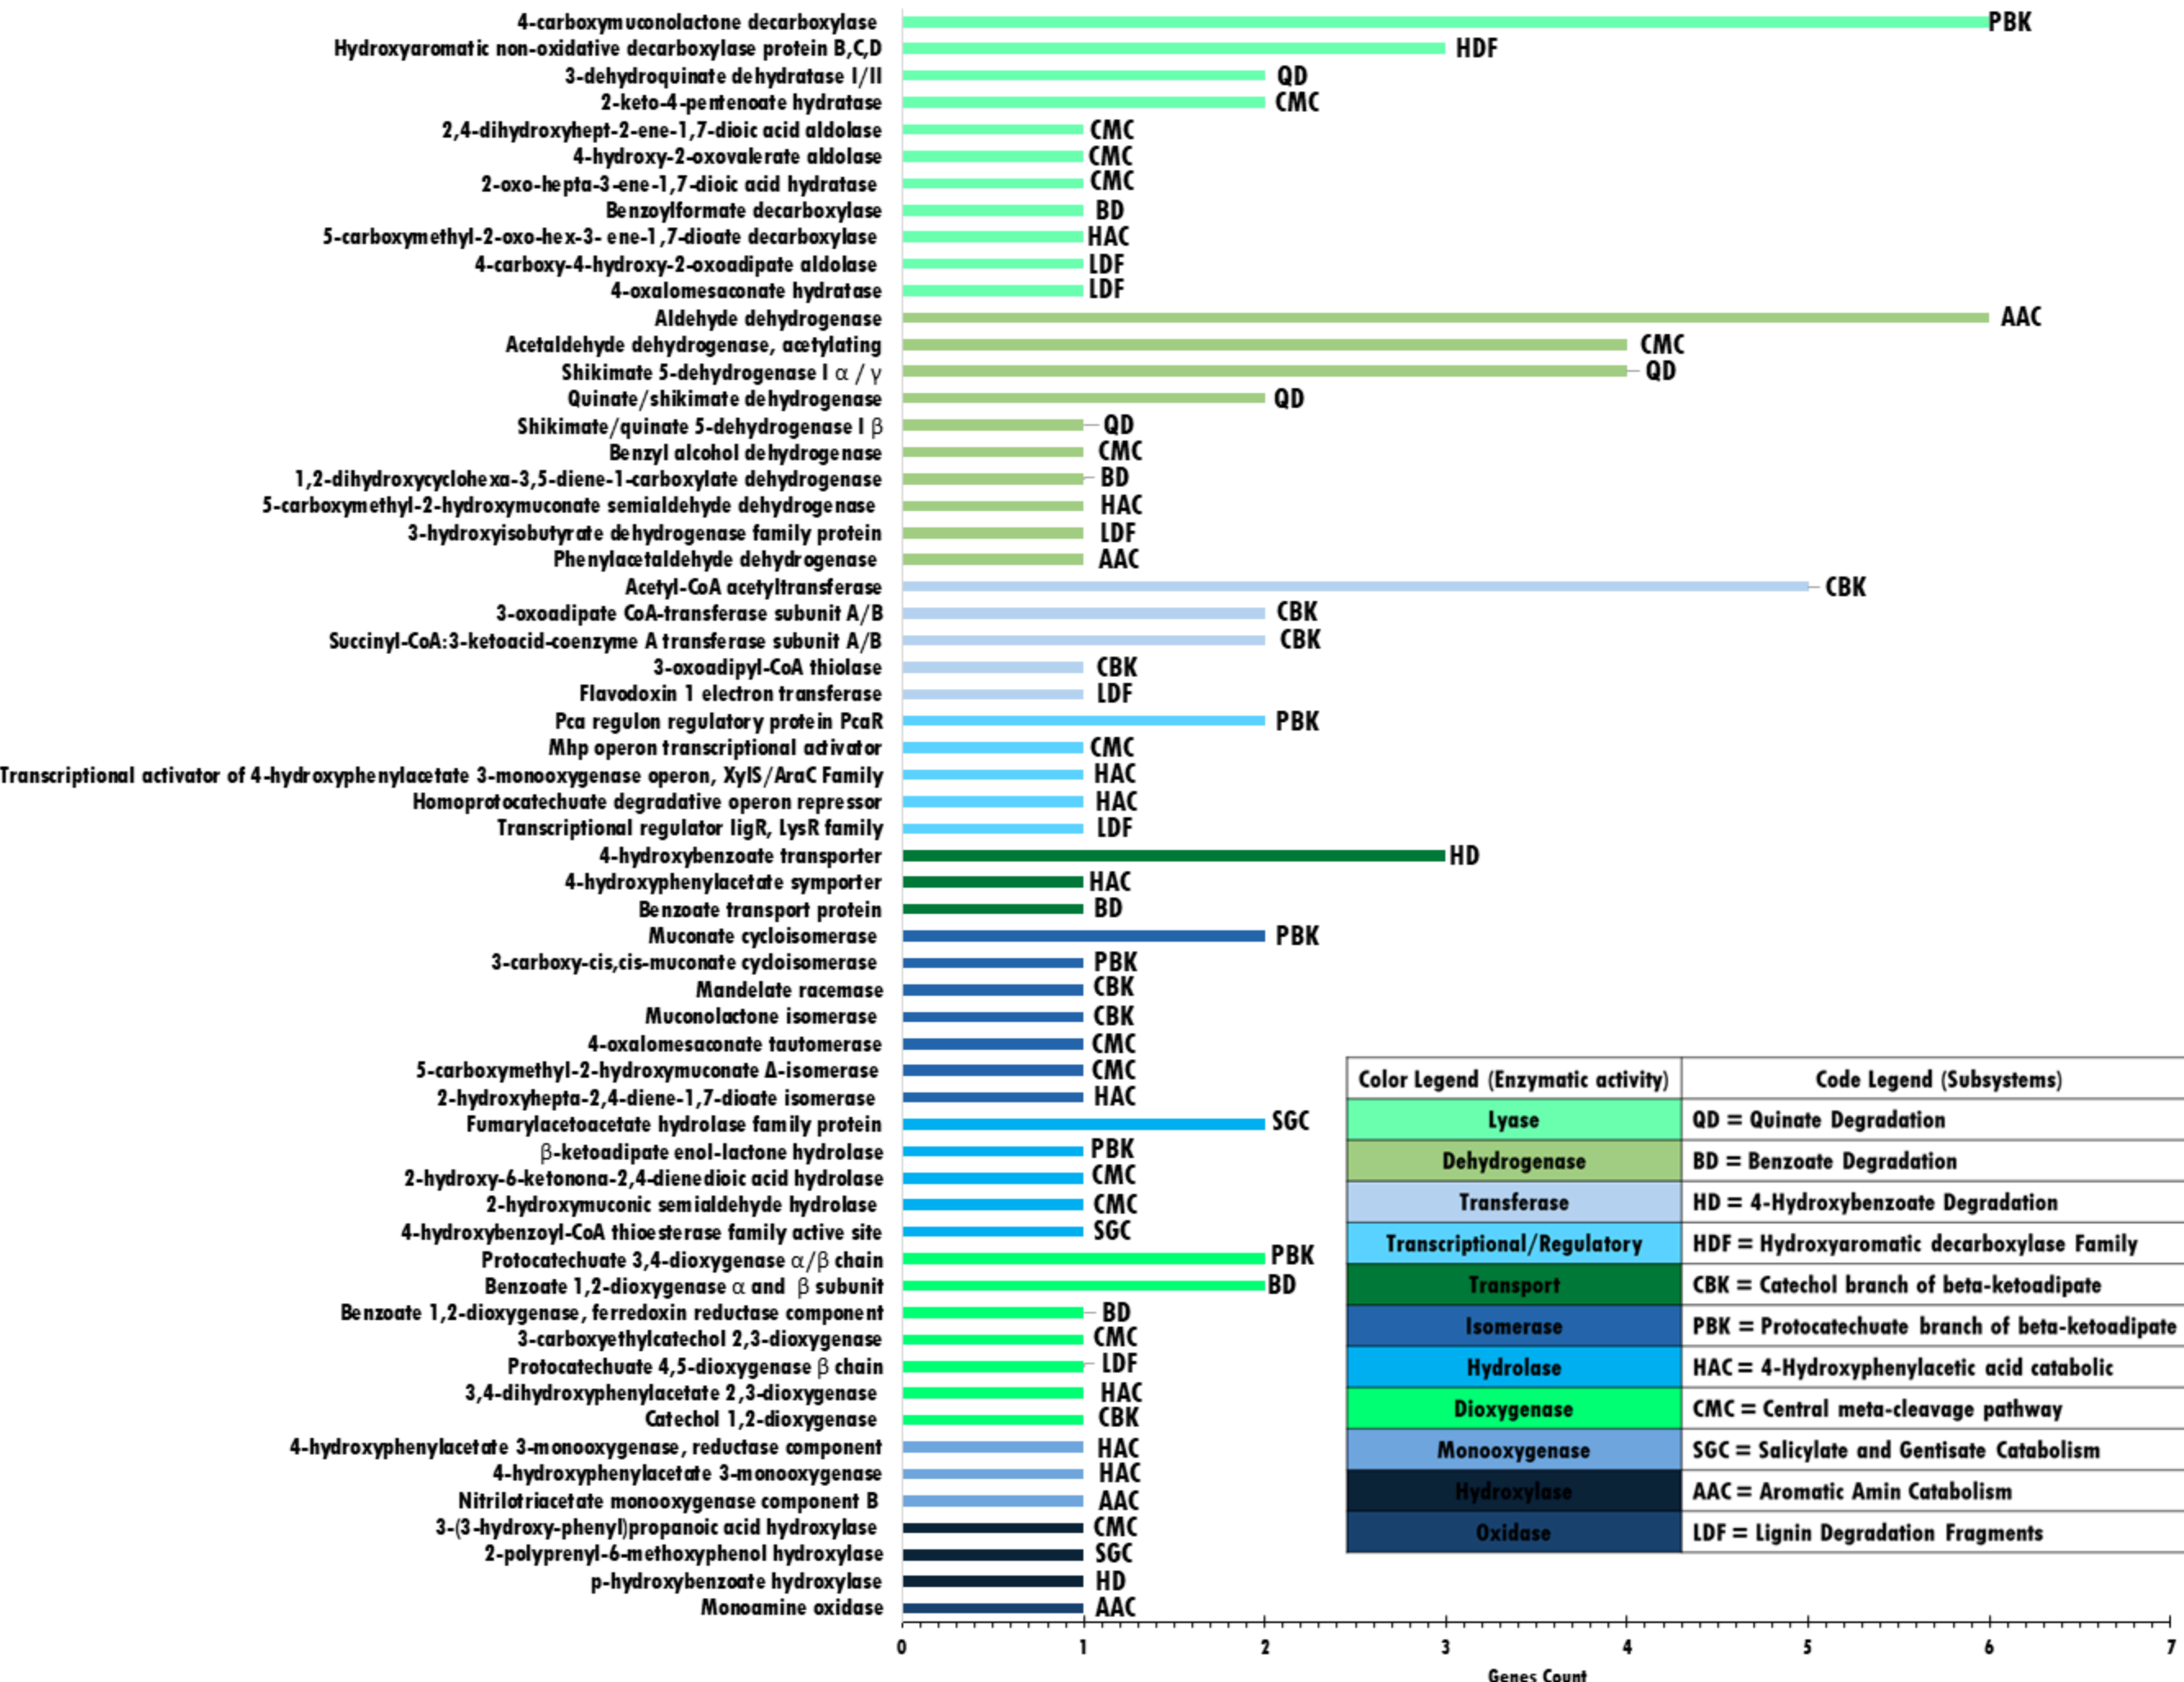

Supplement: pone.0243739.s006.pdf [file pone.0243739.s006.pdf]
